# Supplementary material
Source: PubMed Central journal article supplement (PMC10947797)
Supplement: NIHMS1892088-supplement-Supplementary_material.pdf [file NIHMS1892088-supplement-Supplementary_material.pdf]

## Supplementary Material

| Supplementary Table 1. Baseline Characteristics of Patients with Intraventricular Hemorrhage and Intraparenchymal Hemorrhage Stratified by Etiology. |                    |                             |                       |
|------------------------------------------------------------------------------------------------------------------------------------------------------|--------------------|-----------------------------|-----------------------|
|                                                                                                                                                      | IP-IVH<br>(n = 46) | HTN-IPH<br>(n = 399)        | CAA-IPH<br>(n = 351)  |
| Age (years), mean $\pm$ SD                                                                                                                           | 74 ( $\pm$ 12)     | 70 ( $\pm$ 14) <sup>a</sup> | 75 ( $\pm$ 11)        |
| Female sex                                                                                                                                           | 18 (39)            | 170 (43)                    | 169 (48)              |
| Past medical history                                                                                                                                 |                    |                             |                       |
| <i>Hypertension</i>                                                                                                                                  | 40 (87)            | 345 (87)                    | 265 (76)              |
| <i>Hyperlipidemia</i>                                                                                                                                | 27 (59)            | 199 (50)                    | 190 (54)              |
| <i>Diabetes</i>                                                                                                                                      | 14 (30)            | 108 (27)                    | 60 (17) <sup>a</sup>  |
| <i>Coronary artery disease</i>                                                                                                                       | 15 (33)            | 80 (20)                     | 69 (20)               |
| <i>Atrial fibrillation</i>                                                                                                                           | 19 (41)            | 92 (23) <sup>a</sup>        | 64 (18) <sup>b</sup>  |
| Prior cerebrovascular events                                                                                                                         |                    |                             |                       |
| <i>Previous ischemic stroke</i>                                                                                                                      | 12 (26)            | 206 (27)                    | 52 (15)               |
| <i>Previous hemorrhage</i>                                                                                                                           | 2 (4)              | 40 (10)                     | 58 (17) <sup>a</sup>  |
| Substance use                                                                                                                                        |                    |                             |                       |
| <i>Smoking history</i>                                                                                                                               | 31 (67)            | 208 (52) <sup>a</sup>       | 173 (50) <sup>a</sup> |
| <i>Alcohol abuse</i>                                                                                                                                 | 17 (37)            | 156 (39)                    | 137 (39)              |
| Premorbid disability                                                                                                                                 |                    |                             |                       |
| <i>Prior dependence</i>                                                                                                                              | 15 (33)            | 73 (18) <sup>a</sup>        | 64 (18) <sup>a</sup>  |
| <i>Dementia</i>                                                                                                                                      | 9 (20)             | 33 (8) <sup>a</sup>         | 32 (9) <sup>a</sup>   |
| <i>Baseline mRS, median (IQR)</i>                                                                                                                    | 1 (0, 3)           | 0 (0, 2) <sup>a</sup>       | 0 (0, 0) <sup>a</sup> |
| Antithrombotic therapies                                                                                                                             |                    |                             |                       |
| <i>None</i>                                                                                                                                          | 11 (24)            | 164 (41) <sup>a</sup>       | 158 (45) <sup>a</sup> |
| <i>Antiplatelet</i>                                                                                                                                  | 26 (57)            | 187 (47)                    | 164 (47)              |
| <i>Anticoagulant</i>                                                                                                                                 | 17 (37)            | 91 (23) <sup>a</sup>        | 50 (14) <sup>b</sup>  |

Data are counts (n) and percentages (%), means and standard deviations (SD), or medians and interquartile ranges (IQR). The *p* values reported in the HTN-ICH column refer to comparisons between patients with IP-IVH and HTN-ICH. The *p* values reported in the CAA-ICH column refer to comparisons between patients with IP-IVH and CAA. mRS: modified Rankin Scale; IP-IVH: idiopathic primary intraventricular hemorrhage; HTN-ICH: hypertensive cerebral small vessel disease-related intraparenchymal hemorrhage; CAA-ICH: cerebral amyloid angiopathy-related intraparenchymal hemorrhage. <sup>a</sup>*p* < 0.05; <sup>b</sup>*p* < 0.001; all others not significant.

Supplementary Table 2. Imaging Characteristics of Patients with Intraventricular Hemorrhage and Intraparenchymal Hemorrhage Stratified by Etiology.

|                                                           | IP-IVH<br>(n = 35) | HTN-IPH<br>(n = 399)  | CAA-IPH<br>(n = 351) |
|-----------------------------------------------------------|--------------------|-----------------------|----------------------|
| <i>Presence of cerebral microinfarcts</i>                 | 6 (16)             | 47 (12)               | 50 (14)              |
| <i>Severe white matter hyperintensities (Fazekas ≥ 2)</i> | 32 (87)            | 316 (79)              | 265 (76)             |
| <i>White matter hyperintensity patterns</i>               |                    |                       |                      |
| <i>Multiple subcortical spots</i>                         | 8 (22)             | 41 (10) <sup>a</sup>  | 39 (11)              |
| <i>Anterior subcortical patches</i>                       | 10 (27)            | 68 (17)               | 46 (13)              |
| <i>Large posterior subcortical patches</i>                | 13 (35)            | 107 (27)              | 91 (26)              |
| <i>Peri-basal ganglia pattern</i>                         | 2 (5)              | 46 (12)               | 11 (3)               |
| <i>Presence of lacunes</i>                                | 18 (49)            | 177 (44)              | 74 (21) <sup>a</sup> |
| <i>Presence of deep lacunes</i>                           | 15 (41)            | 163 (41)              | 55 (16) <sup>a</sup> |
| <i>Presence of lobar lacunes</i>                          | 5 (14)             | 42 (11)               | 31 (9)               |
| <i>Presence of severe perivascular spaces (BG)</i>        | 7 (19)             | 57 (14)               | 25 (7) <sup>a</sup>  |
| <i>Presence of severe perivascular spaces (CSO)</i>       | 5 (14)             | 29 (7)                | 40 (11)              |
| <i>Presence of cortical superficial siderosis</i>         | 7 (20)             | 30 (8) <sup>a</sup>   | 91 (26)              |
| <i>Presence of cerebral microbleeds</i>                   | 18 (51)            | 243 (61)              | 181 (52)             |
| <i>Presence of cerebral microbleeds (deep)</i>            | 8 (23)             | 193 (48) <sup>a</sup> | 0 (0) <sup>b</sup>   |
| <i>Presence of cerebral microbleeds (lobar)</i>           | 14 (40)            | 175 (44)              | 169 (48)             |
| <i>Strictly deep ICH/microbleeds</i>                      | 4 (11)             | 58 (15)               | 0 (0) <sup>b</sup>   |
| <i>Strictly lobar ICH/microbleeds</i>                     | 10 (29)            | 40 (10) <sup>a</sup>  | 169 (48)             |
| <i>Mixed-location ICH/microbleeds</i>                     | 4 (11)             | 135 (34) <sup>a</sup> | 0 (0) <sup>b</sup>   |
| <i>No microbleeds</i>                                     | 17 (49)            | 166 (42)              | 182 (52)             |
| <i>Presence of any cSVD biomarker</i>                     | 33 (94)            | 354 (89)              | 313 (89)             |
| <i>SVD score, median (IQR)</i>                            | 2 (1, 3)           | 2 (1, 3)              | 2 (1, 3)             |

Data are counts (n) and percentages (%), means and standard deviations (SD), or medians and interquartile ranges (IQR). The *p* values reported in the HTN-ICH column refer to comparisons between patients with IP-IVH and HTN-ICH. The *p* values reported in the CAA-ICH column refer to comparisons between patients with IP-IVH and CAA. IVH: idiopathic primary intraventricular hemorrhage; ICH: intracerebral hemorrhage; cSVD: cerebral small vessel disease; HTN-ICH: hypertensive cerebral small vessel disease-related intraparenchymal hemorrhage; CAA-ICH: cerebral amyloid angiopathy-related intraparenchymal hemorrhage; BG: basal ganglia; CSO: centrum semiovale. <sup>a</sup>*p* < 0.05; <sup>b</sup>*p* < 0.001; all others not significant.
